# Supplementary material
Source: Royal Society of Chemistry journal article supplement (doi:10.1039/d6cc00950f)
Supplement: d6cc00950f1.pdf [file d6cc00950f1.pdf]

## Supplementary Information

### **Interfacial stabilization of quantum dot/liquid crystal co-assemblies for efficient circularly polarized luminescence**

Junlong Xiao, Qiulian Liu, Qinglong Tu, Muhammad Umer, Nan Ren, Qiang Jing\*, Haiguang Zhao\*, Yang Song\*

College of Physics, State Key Laboratory of Bio-Fibers and Eco-Textiles, College of Textiles & Clothing, Qingdao University, No. 308 Ningxia Road, Qingdao 266071, P.R. China.

\*Corresponding authors. E-mail: jingq@qdu.edu.cn (Q.J.); hgzhao@qdu.edu.cn (H.Z.); yangsong@qdu.edu.cn (Y.S.)

## Experimental Methods

### Materials

Cadmium oxide, Zinc acetate, Selenium, Sulfur, 1-Octadecene, Oleic acid (OA), Trioctylphosphine (TOP), Phenyl Stearate, Toluene, reactive mesogen 2-Methyl-1,4-phenylene bis(4-(3-(acryloyloxy)propoxy)benzoate) (RM257), chiral dopant LC756 were all purchased from Aladdin Chemical Co., Ltd., Shanghai, China. All chemicals were used as received.

### Synthesis and ligands exchange of quantum dots

0.4 mmol CdO, 4 mmol Zn(AC)<sub>2</sub>, 17.6 mmol oleic acid (OA), and 20 mL 1-octadecene (ODE) were placed in a 100 mL round-bottom flask. The mixture was heated to 150 °C and degassed for 20 minutes, followed by purging with N<sub>2</sub> gas. The temperature was then raised to 310 °C to form a clear solution of Cd(OA)<sub>2</sub> and Zn(OA)<sub>2</sub>. At this temperature, a solution of 0.4 mmol Se and 4 mmol S in 3 mL tri-n-octylphosphine (TOP) was swiftly injected into the reaction flask. After 1 minute of reaction, the system was cooled to room temperature. Two 5 mL portions of the quantum dot solution with a concentration of 20 mg/mL were transferred to glass vials, to which 10 mmol OA and 10 mmol TOP were added separately. The mixtures were heated to 120 °C and stirred for 36 h. The quantum dots were washed three cycles with toluene and methanol, and finally redispersed in toluene for storage.

### Preparation of co-assembly film

500 mg of RM257, 25 mg of LC756, and 15 mg of phenyl stearate were placed in a glass vial. Then add 1 mL of toluene and heat it to 60 °C until the solution becomes transparent. Subsequently, 1 mL of 20 mg/mL quantum dots toluene solution was added. The mixture was heated to 120 °C until the toluene completely evaporated. The precursor was then poured into a liquid crystal cell (composed of two identical glass slides and a 25 μm thick spacer). UV photopolymerization was carried out at 90 °C for 5 minutes, after which the liquid crystal cell was removed to obtain the CLC film. For the preparation of CLC film with dolphin pattern, UV photopolymerization was first performed at 90 °C through a photomask after pouring the precursor into the liquid crystal cell. The mask was then removed, followed by a second round of UV photopolymerization at 25 °C.

### Characterization

The lattice structure of the synthesized CdSe/ZnS quantum dots was characterized by transmission electron microscopy (TEM, JEOL, JEM-2100 F) at an accelerating voltage of 200 kV. The elemental composition and functional groups of the ligand-exchanged quantum dots were analyzed using X-ray photoelectron spectroscopy (XPS, Axis Supra+) and Fourier-transform infrared spectroscopy (FTIR, ESCALAB Xi+, Thermo Fisher Scientific). Fluorescence microscopy images of the quantum dot/liquid crystal co-assemblies were obtained with a fluorescence microscope (BX53, Olympus Corporation). The circularly polarized luminescence (CPL) and circular dichroism (CD) of the cholesteric liquid crystal films were characterized using a CPL measurement system (CPL-300, JASCO Corporation) and a CD spectrometer (J-1500, JASCO Corporation), respectively. The reflection artifacts are avoided by removing the substrate and detecting the pure co-assembly films. The fluorescence and reflection spectra were measured with a micro-fiber optic spectrometer (USB200+, Ocean Optics).

### Calculation

The circular dichroism (CD) is calculated by  $CD = 32980 \times (AL - AR)$ , where AL and AR represent the absorbance of left-handed and right-handed circularly polarized light for the sample, respectively. The CPL is calculated by  $CPL = 32980 \times ((I_L - I_R) / 2I_A)$ , where I<sub>A</sub> denotes the average light intensity (I<sub>A</sub>)

corresponding to the direct current (DC) component collected by the JASCO CPL-300 circularly polarized fluorescence spectrometer during the measurement process. The  $g_{lum}$  is calculated by  $g_{lum} = 2 \times (I_L - I_R) / (I_L + I_R)$ , where  $I_L$  and  $I_R$  represent the intensities of the left and right circularly polarized emissions, respectively. The coefficient  $32980 \approx 1000 \times (180 \times \ln 10) / 4\pi$ , converting the detected absorbance of instruments to ellipticity.

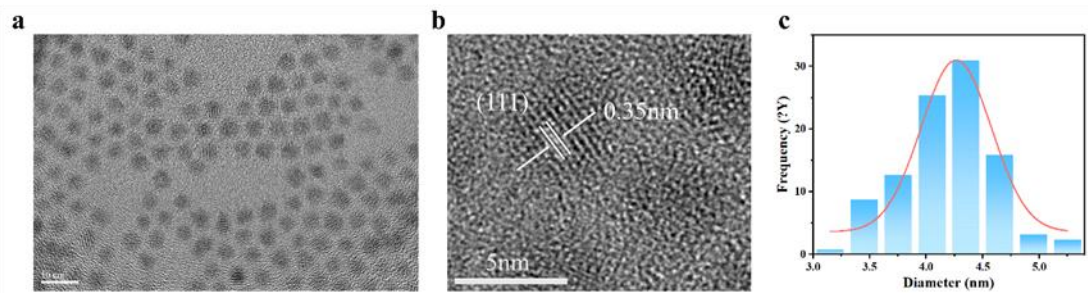

**Figure S1.** TEM micrographs (a, b) and size distribution histogram (c) of the CdSe/ZnS quantum dots.

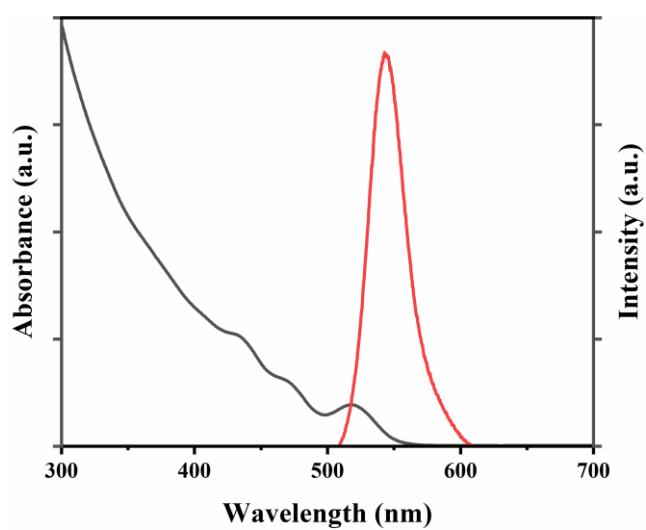

**Figure S2.** The absorption and emission spectra of quantum dots.

|       |                                                                                    |
|-------|------------------------------------------------------------------------------------|
| OA    | 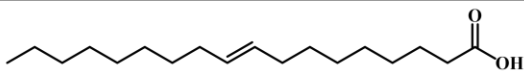 |
| TOP   |  |
| PS    |  |
| RM257 |  |
| LC756 |  |

**Figure S3.** Chemical structural formulas of the key compounds used in this study.

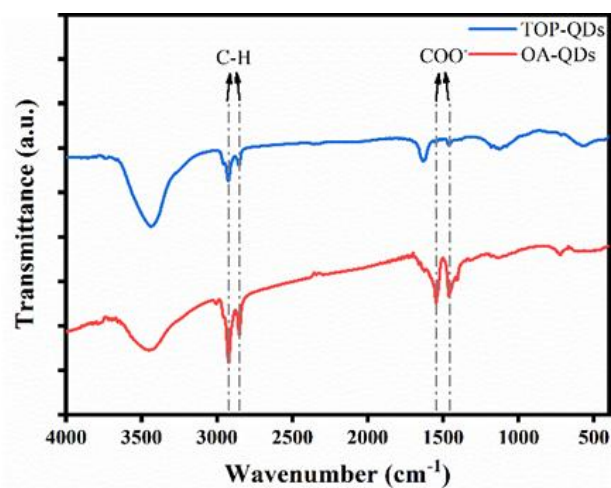

**Figure S4.** Fourier-transform infrared (FTIR) spectra of the quantum dots after ligand exchange.

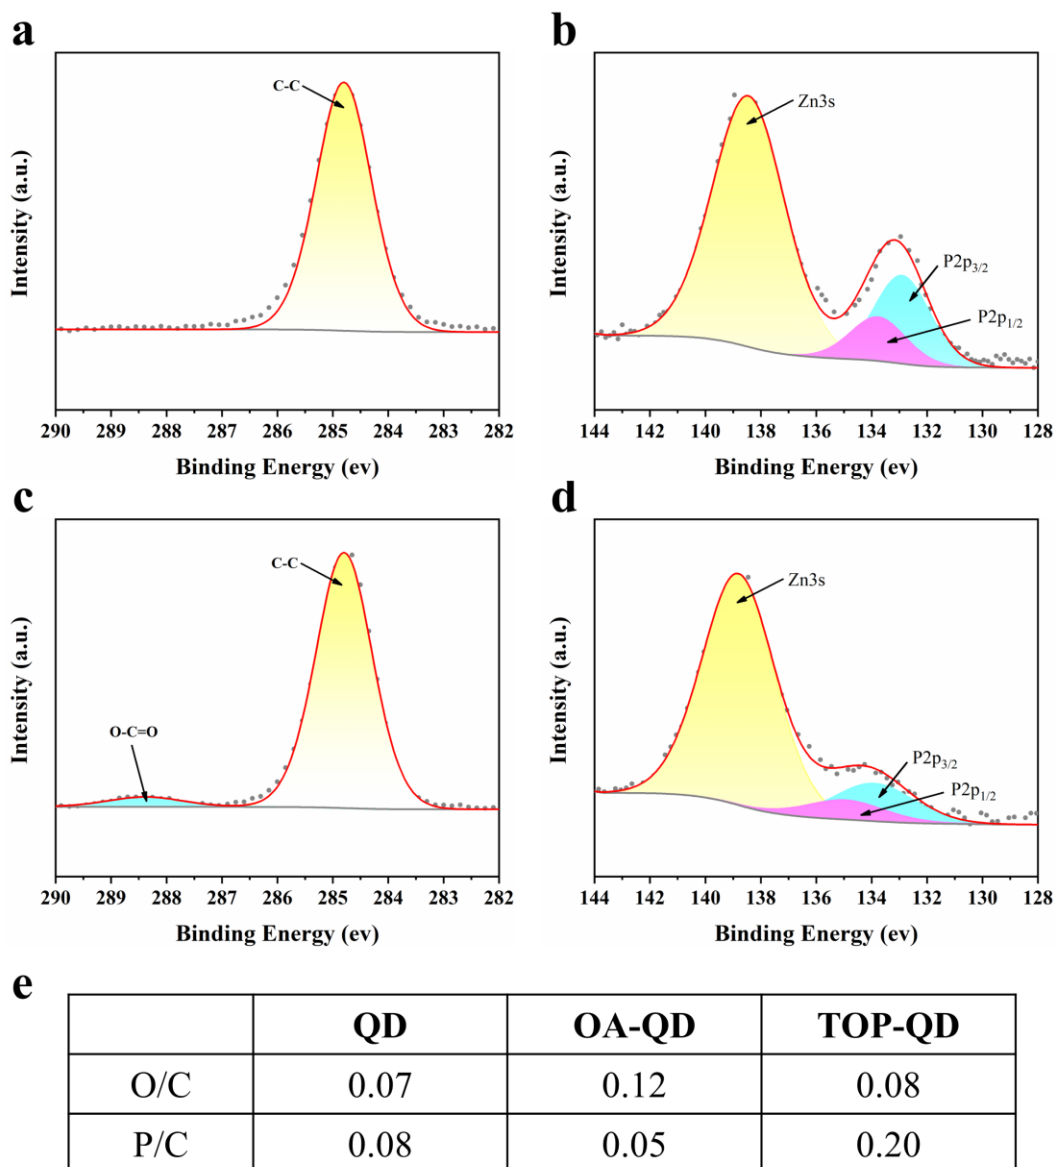

**Figure S5.** X-ray photoelectron spectroscopy (XPS) analysis of the quantum dots after ligand exchange. (a, b) High-resolution C 1s and P 2p spectra of TOP-QDs; (c, d) High-resolution C 1s and P 2p spectra of OA-QDs; (e) Quantitative XPS element ratios (P/C, O/C) before and after ligand exchange.

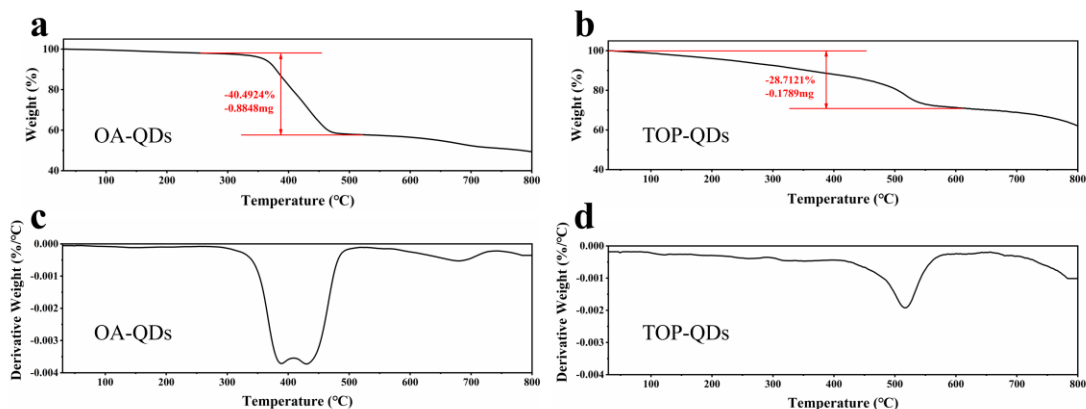

**Figure S6.** Thermogravimetry (TG) analysis of the quantum dots after ligand exchange. (a, c) TG and DTG spectra of OA-QDs; (b, d) TG and DTG spectra of TOP-QDs. The TG curve shows the ligand contents of OA-QDs and TOP-QDs are 40.5% and 28.7%, respectively.

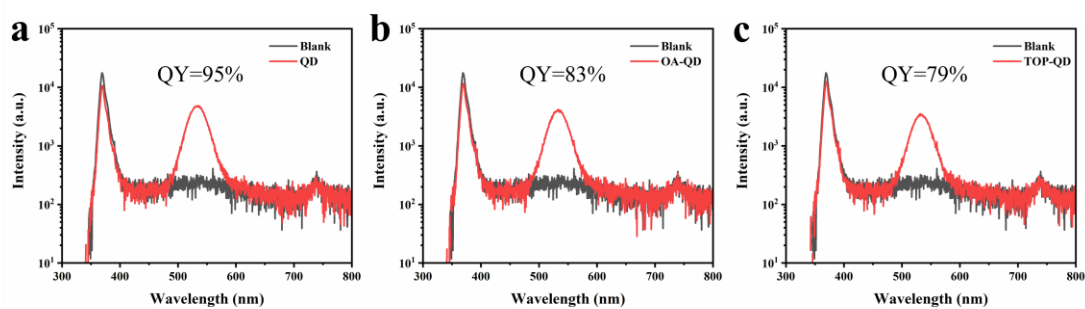

**Figure S7.** The PLQY of QDs before and after ligand exchange. (a) The PLQY of QDs before ligand exchange; (b, c) The PLQY of OA-QDs and TOP-QDs. All the PLQYs were measured by the Ocean Optics integrating sphere system.

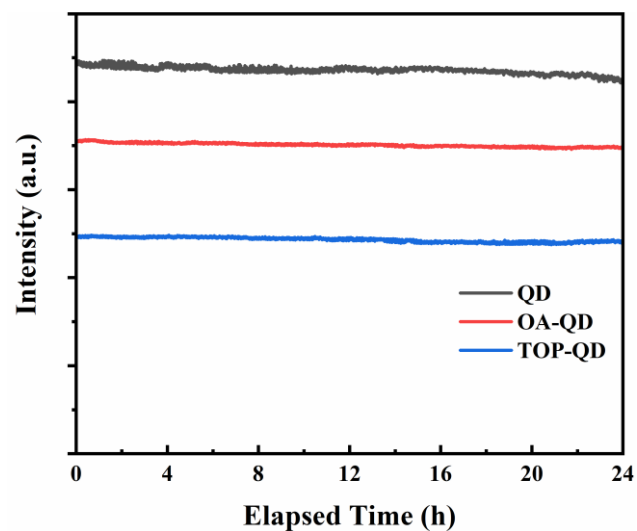

**Figure S8.** The photoluminescence stability of QDs before and after ligand exchange.

|         |          | 1                                                                                   | 2                                                                                   | 3                                                                                   | 4                                                                                    | 5                                                                                     | Mean |
|---------|----------|-------------------------------------------------------------------------------------|-------------------------------------------------------------------------------------|-------------------------------------------------------------------------------------|--------------------------------------------------------------------------------------|---------------------------------------------------------------------------------------|------|
| OA-QDs  | Heat Map | 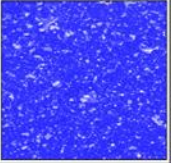 |  |  |  |  |      |
|         | CV       | 0.47                                                                                | 0.49                                                                                | 0.52                                                                                | 0.51                                                                                 | 0.43                                                                                  | 0.48 |
| TOP-QDs | Heat Map |  |  |  |  |  |      |
|         | CV       | 0.37                                                                                | 0.39                                                                                | 0.34                                                                                | 0.35                                                                                 | 0.40                                                                                  | 0.37 |
| PS-QDs  | Heat Map |  |  |  |  |  |      |
|         | CV       | 0.25                                                                                | 0.26                                                                                | 0.26                                                                                | 0.26                                                                                 | 0.27                                                                                  | 0.26 |

**Figure S9.** Statistics of multiple areas of OA-QD, TOP-QD and PS-QD.

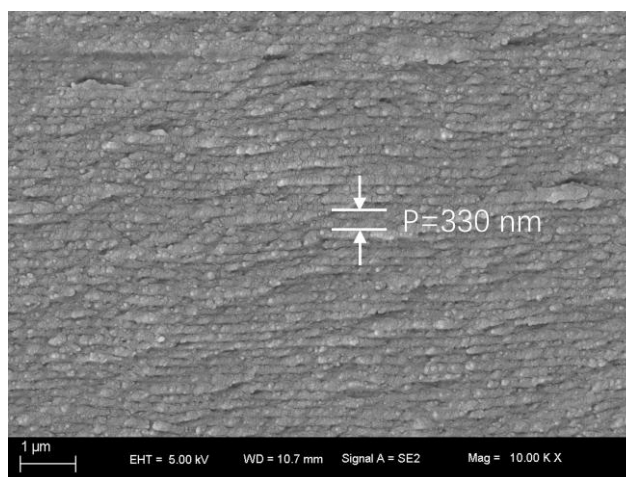

**Figure S10.** The cross-section SEM image of co-assembly film.

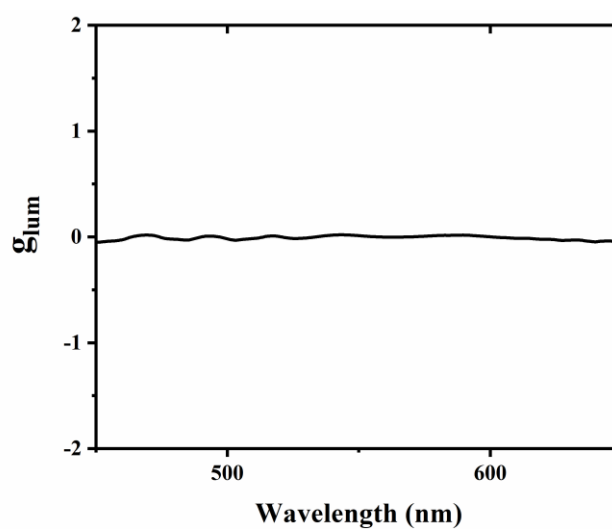

**Figure S11.** The  $g_{lum}$  spectrum of non-assembled sample, which is photopolymerized at temperatures above the liquid crystal critical temperature.

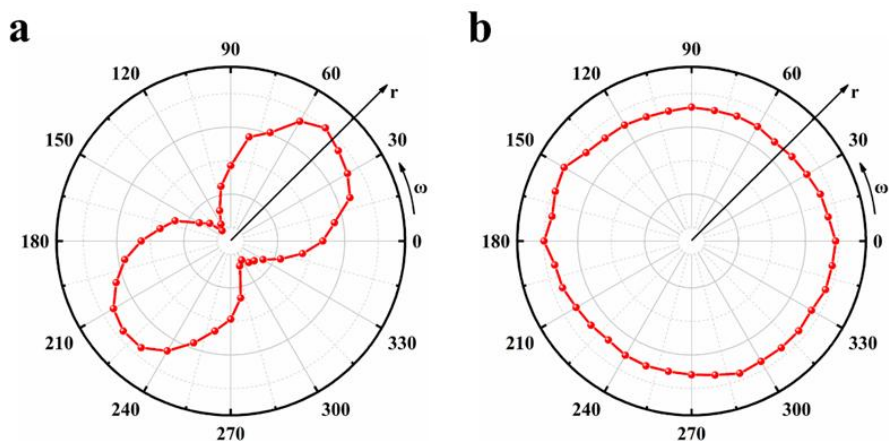

**Figure S12.** Emission intensity of the co-assembly film as a function of polarizer angle, with the quarter-wave plate installed and removed, where  $\omega$  represents the transmission angle of the polarizer and  $r$  represents the transmittance.

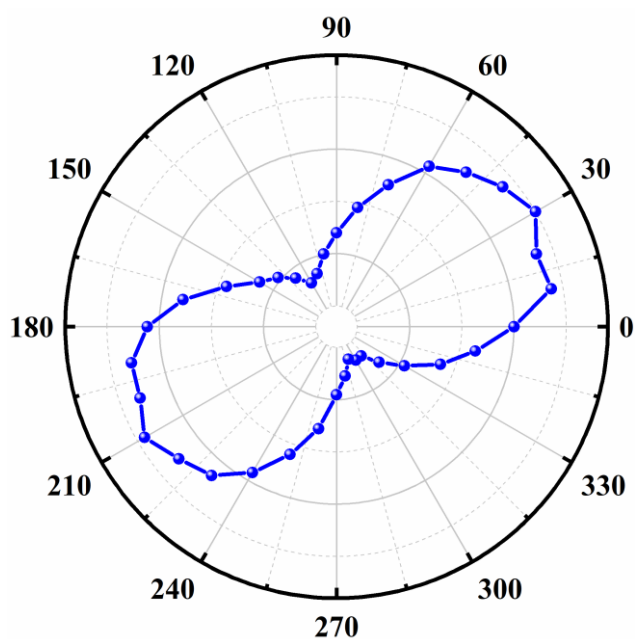

**Figure S13.** The performance of linearly polarized luminescent film made by co-assembly. Apart from the absence of chiral dopants, this film shares the same composition as CPL film and is directionally assembled via friction alignment method.

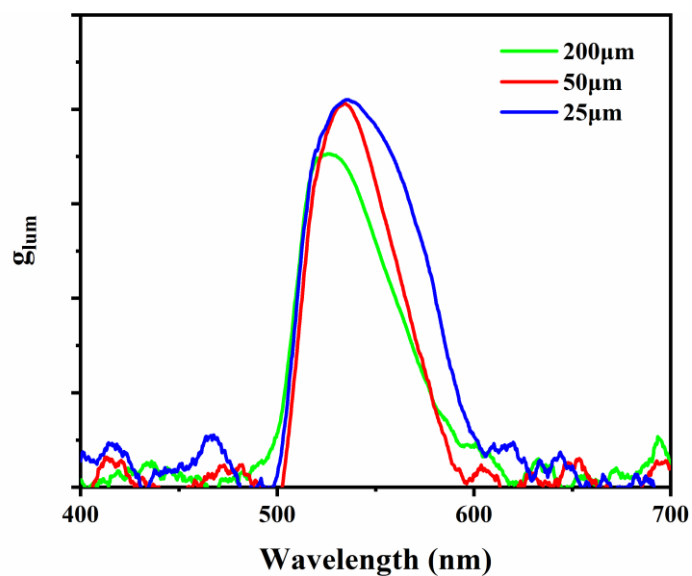

**Figure S14.** The  $g_{lum}$  of co-assembly films with different thickness. The smaller  $g_{lum}$  value of 200  $\mu\text{m}$  thick film indicates more structural defects in it.

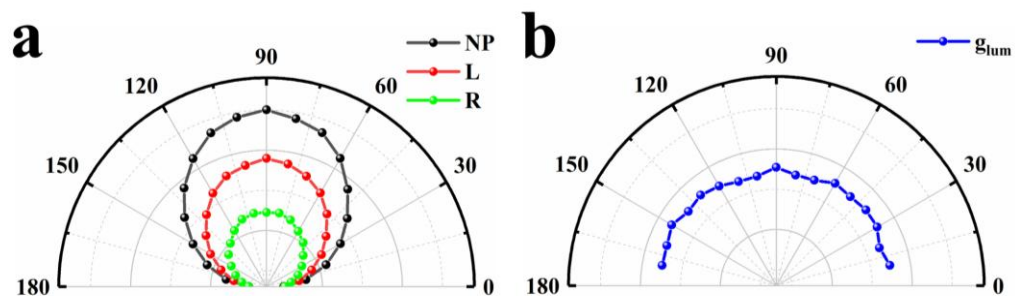

**Figure S15.** (a) The angle-dependent emission intensity and (b) the angle-dependent  $g_{lum}$  of co-assembly film. NP, L and R represent the non-polarization, left-hand polarization and right-hand polarization, respectively.

**Table S1.** Performance statistics for solid-state QDs-CLC co-assembly materials.

| <b>Emitter</b> | <b>CPL (mdeg)</b> | <b>CD (mdeg)</b> | <b><math>g_{lum}</math></b> | <b>References</b>                                                                                                                                                                                                                             |
|----------------|-------------------|------------------|-----------------------------|-----------------------------------------------------------------------------------------------------------------------------------------------------------------------------------------------------------------------------------------------|
| CdSe/ZnS       | 6000              | -28000           | 1.1                         | This work                                                                                                                                                                                                                                     |
| CdSe/ZnS       | $\pm 150000$      |                  | -0.484<br>and<br>0.350      | Guo Y, Ye Z, Cui Y, et al. Dual Mode Circularly Polarized Luminescence Enabled by Spray Deposition Quantum Dots on a Porous Cholesteric Liquid Crystal Template[J]. <i>Small</i> , 2026: e14016.                                              |
| CdSe/ZnS       |                   |                  | -0.2318                     | Liu X, Zola R S, Chen Y, et al. Strain-Responsive Circularly Polarized Luminescence in Cholesteric Liquid Crystal Elastomers through Laser-Engineered Microstructures[J]. <i>Advanced Functional Materials</i> , 2025: e28997.                |
| CdSe/ZnS       | -1200             |                  | -0.74                       | Li S, Tang Y, Fan Q, et al. When quantum dots meet blue phase liquid crystal elastomers: visualized full-color and mechanically-switchable circularly polarized luminescence[J]. <i>Light: Science &amp; Applications</i> , 2024, 13(1): 140. |
| CdSe/ZnS       | 1200              |                  | 1.0                         | Han D, Peng L, Chen G, et al. Light-driven energy transfer in luminescent helical superstructures coassembled by inorganic and organic molecules[J]. <i>Chemistry of Materials</i> , 2024, 36(8): 3786-3793.                                  |
| CdSe/ZnS       | $\pm 1800$        | 16000            | 0.35                        | Yu H, Zhang K, Yu Q, et al. Enhanced asymmetric circularly polarized luminescence in self-organized helical superstructures enabled                                                                                                           |

|                                     |       |        |                     |                                                                                                                                                                                                                                |
|-------------------------------------|-------|--------|---------------------|--------------------------------------------------------------------------------------------------------------------------------------------------------------------------------------------------------------------------------|
|                                     |       |        |                     | by macro-chiral liquid crystal quantum dots[J]. ACS nano, 2024, 18(46): 32056-32064.                                                                                                                                           |
| CsPbX <sub>3</sub><br>(X=Cl, Br, I) | ±10   | ±1.5   | ±1.5                | Wang Z, Li A, Cao Q, et al. Processable circularly polarized luminescence for the synthesis of chiral plasmonic nanoparticles[J]. Advanced Optical Materials, 2025, 13(4): 2402310.                                            |
| CsPbBr <sub>3</sub>                 | 1500  | -1500  | 1.5                 | Zhang X, Li L, Chen Y, et al. Mechanically tunable circularly polarized luminescence of liquid crystal-templated chiral perovskite quantum dots[J]. Angewandte Chemie, 2024, 136(22): e202404202.                              |
| CsPbBr <sub>3</sub>                 |       |        | 1.46<br>and<br>1.31 | Liu T D, Kuo C C, Chang Y C, et al. Ultrabroadband Chiral Emission from Cu Nanocluster Eggshell Membrane/CsPbBr <sub>3</sub> QD Composites with a Cholesteric Superstructures[J]. Advanced Functional Materials, 2026: e15810. |
| InP/ZnSeS/Z<br>nS                   | 6000  | -30000 | 0.89                | Guo Q, Zhang M, Tong Z, et al. Multimodal-responsive circularly polarized luminescence security materials[J]. Journal of the American Chemical Society, 2023, 145(7): 4246-4253.                                               |
| InP/ZnSeS/Z<br>nS                   | 10000 | -14000 | 1.0                 | Zhang M, Gao W, Zhao S, et al. Polymerization-with-assembly enables homogeneous circularly polarized luminescence structures[J]. Nano Research, 2025, 18(7).                                                                   |
